# Supplementary material for: MgH2–TiH2 mixture as an anode for lithium-ion batteries: synergic enhancement of the conversion electrode electrochemical performance
Source: Royal Society of Chemistry journal article supplement (doi:10.1039/c5ta02545a), 2015-01-01
Supplement: c5ta02545a1.pdf [file c5ta02545a1.pdf]

## MgH<sub>2</sub>-TiH<sub>2</sub> Mixture as Anode for Lithium-ion Batteries: Synergic Enhancement of the Conversion Electrode Electrochemical Performance

Liwu Huang,<sup>ab</sup> Luc Aymard<sup>\*a</sup> and Jean-Pierre Bonnet<sup>a</sup>

<sup>a</sup>Laboratoire de Réactivité et Chimie des Solides - LRCS - UMR CNRS-UPJV 7314, 33 rue Saint-Leu, 80039 Amiens, France

<sup>b</sup>Department of Advanced Energy Materials, College of Materials Science and Engineering, Sichuan University, Chengdu, 610064, China

### Supporting Information:

**Table S1:** EDS analysis of 0.7 Mg+0.3Ti mixture ground for 4 hours under 60 bars of hydrogen pressure at three different sample positions.

| Mg (at.%) | Ti (at.%) |
|-----------|-----------|
| 67.23     | 32.77     |
| 72.47     | 27.53     |
| 70.56     | 29.44     |

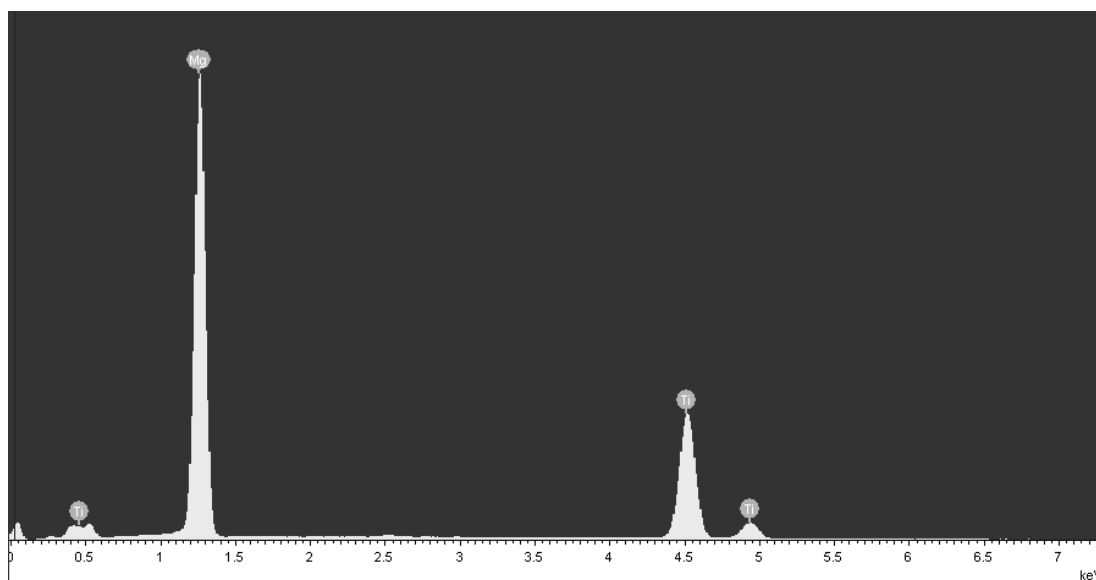

**Figure S1:** EDS Spectrum 2 of 0.7Mg+0.3Ti (72.47/27.53 %) mixture ground for 4 hours under 60 bars of hydrogen pressure.

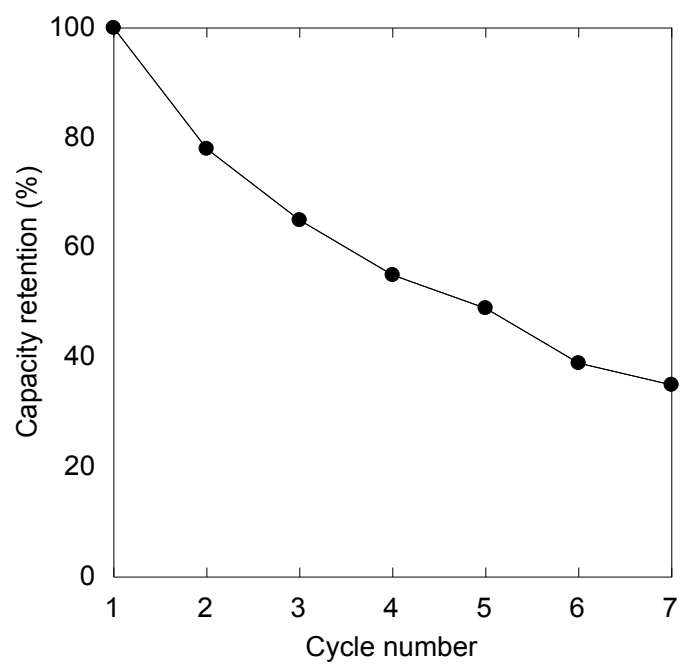

**Figure S2:** Capacity retention (%) as a function of the cycle number for 0.7MgH<sub>2</sub>-0.3TiH<sub>2</sub>/Li cell discharged at a current rate of 0.1 lithium per hour between 3.000 V and 0.005 V.

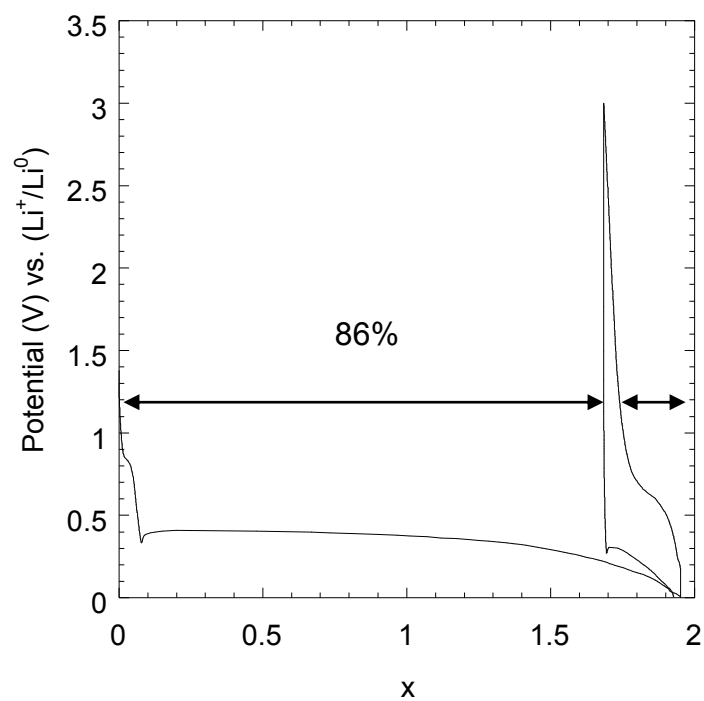

**Figure S3:** Potential-capacity curve of MgH<sub>2</sub> electrode, at a current rate of one lithium in 10 hours and with 30% of added super p carbon.

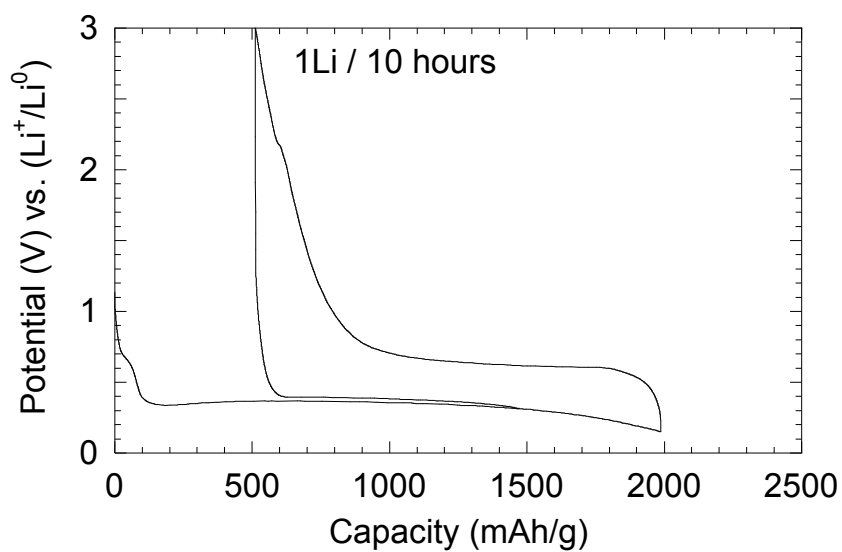

**Figure S4:** Potential capacity curve for  $\text{MgH}_2$  electrode (Capacity in mAh/g) (corresponding to Figure 5(a)).

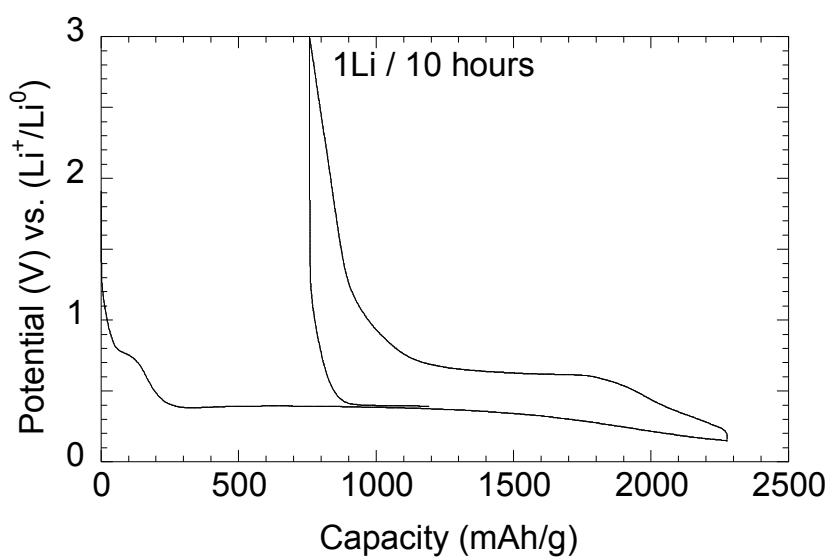

**Figure S5:** Potential capacity curve for  $0.7\text{MgH}_2 + 0.3\text{TiH}_2$  mixture electrode (Capacity in mAh/g) (corresponding to Figure 5(b)).

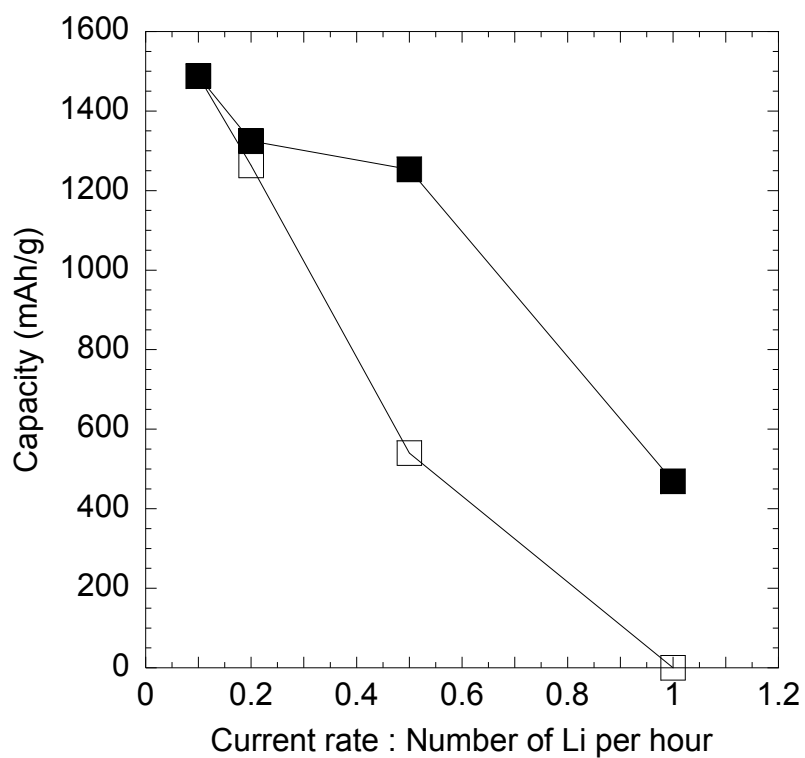

**Figure S6:** Reversible electrochemical capacity (capacity in mAh/g) for 0.7MgH<sub>2</sub> + 0.3TiH<sub>2</sub> mixture (black squares) and MgH<sub>2</sub> (white squares) electrodes at 0.1, 0.2, 0.5 and 1 Li per hour (Corresponding to Figure 5(c)).
